# Supplementary material
Source: publisher figshare collection journal article supplement (https://acs.figshare.com/ndownloader/files/4698784)

# Unusual Oxidation of an N-heterocycle Ligand in Metal-organic Framework

Zhangang Han,<sup>a,b</sup> Jun Peng,<sup>\*a</sup> Yulong Zhao<sup>a</sup> and Carlos J. Gómez-García<sup>c</sup>

<sup>a</sup> Key Laboratory of Polyoxometalate Science of Ministry of Education Institute of Polyoxometalate Chemistry, Department of Chemistry, Northeast Normal University, Changchun, Jilin, 130024, China.

<sup>b</sup> College of Chemistry & Material Science, Hebei Normal University, Shijiazhuang, Hebei, 050016, China.

<sup>c</sup> Instituto de Ciencia Molecular, Universidad de Valencia, Pol. La Coma, 46980 Paterna, Valencia, Spain

E-mail: [hanzg116@yahoo.com.cn](mailto:hanzg116@yahoo.com.cn)

Supporting Materials:

A mixture solution of Cu(NO<sub>3</sub>)<sub>2</sub> (248.7 mg, 1.0 mmol), Na<sub>2</sub>MoO<sub>4</sub> (488.9 mg, 2.1 mmol) and bppy (124.0 mg, 0.4 mmol) was adjusted to *ca.* pH 4.60 with dilute H<sub>3</sub>PO<sub>4</sub> solution. The resultant mixture was sealed in a 25 mL Teflon-lined autoclave (70% full) and heated at 170 °C for 96h. The autoclave was then cooled at 10 °C per hour to RT. Blue crystals of **1** were obtained (yield: 79.1 mg, 63% based on bppy) along with a few yellow crystals which was characterized as salts of Keggin type polyoxometalate (see S-Fig. 3). The blue crystals were washed with water and dried in a desiccator at ambient temperature. Elemental analysis(%) calcd for C<sub>24</sub>H<sub>14</sub>Br<sub>2</sub>Cu<sub>1</sub>N<sub>2</sub>O<sub>4</sub>: C 46.66, H 2.28, N 4.53; found: C 46.32, H 2.37, N 4.26. IR(cm<sup>-1</sup>)(see S-Fig. 2):  $\nu$  = 1650(s), 1600(m), 1480(m), 1350(m), 1260(w), 1170(w), 1040(w), 1010(w), 833(m), 804(m), 694(w), 501(w) and 444(w).

**S-Fig. 1** A room temperature  $^1\text{H}$  NMR spectrum of bppy in  $\text{CDCl}_3$ , tetramethylsilane (TMS) was used as an internal reference.

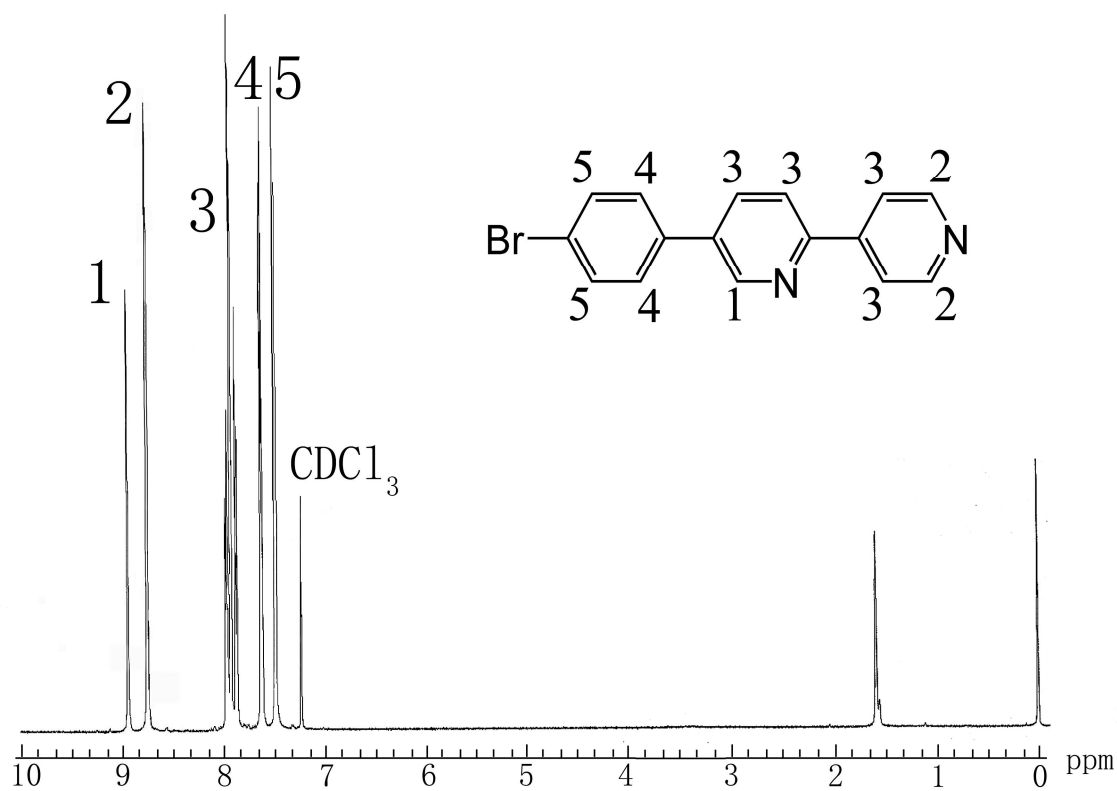

**S-Fig. 2** IR spectra of bppy and compound 1.

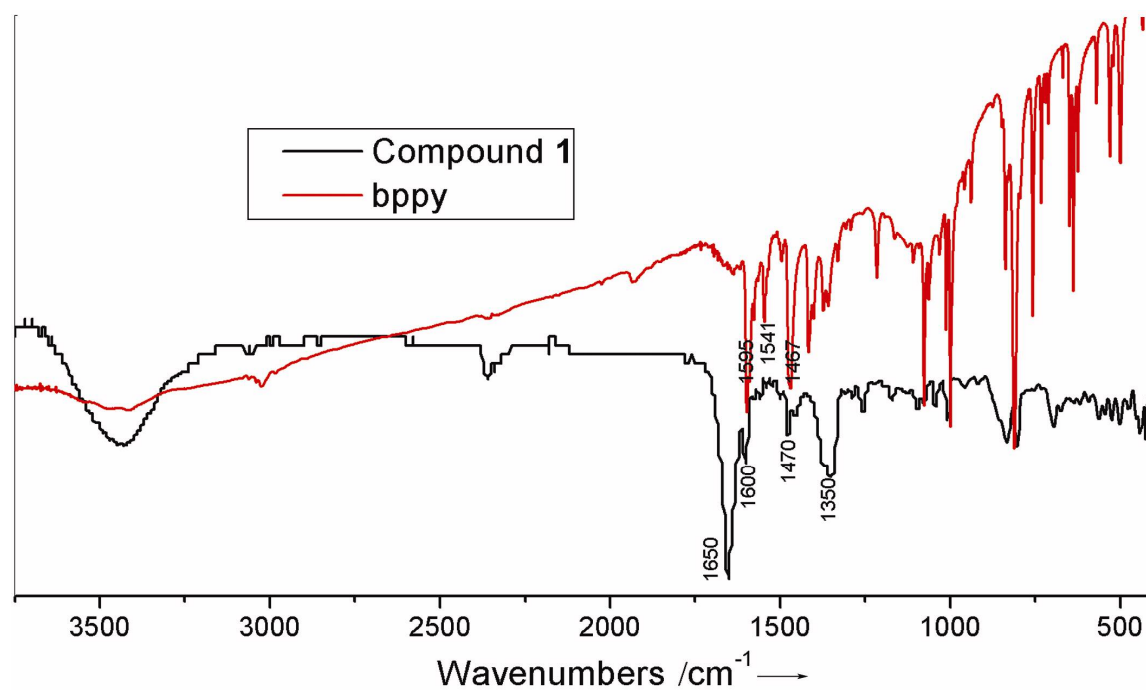

**S-Fig. 3** IR spectrum of Keggin type polyoxometalate.

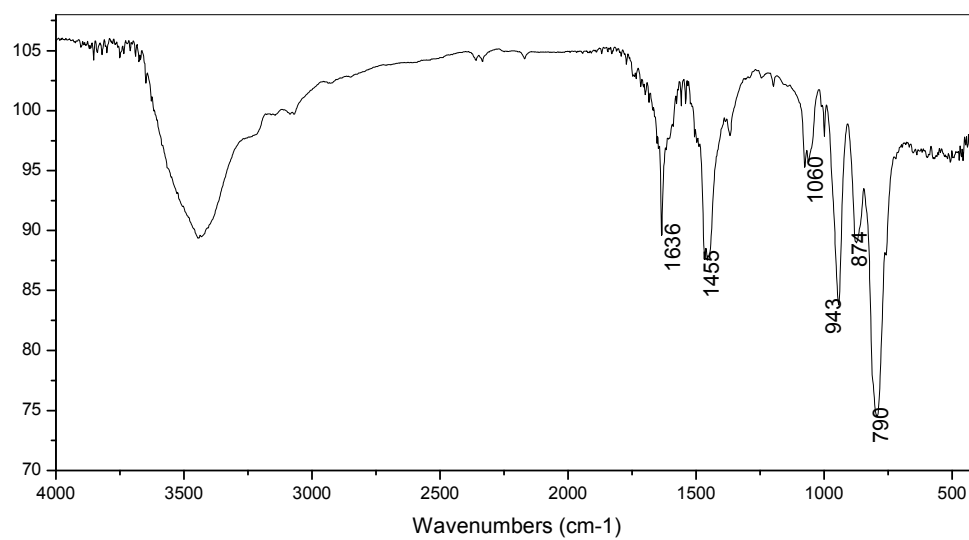

Supplement: Supplementary file 1 [file 4698784]
